# Supplementary material
Source: publisher figshare collection journal article supplement (https://sage.figshare.com/ndownloader/files/15127463)
Supplement: Supplementary file 1 [file 15127463]

# Supplementary material


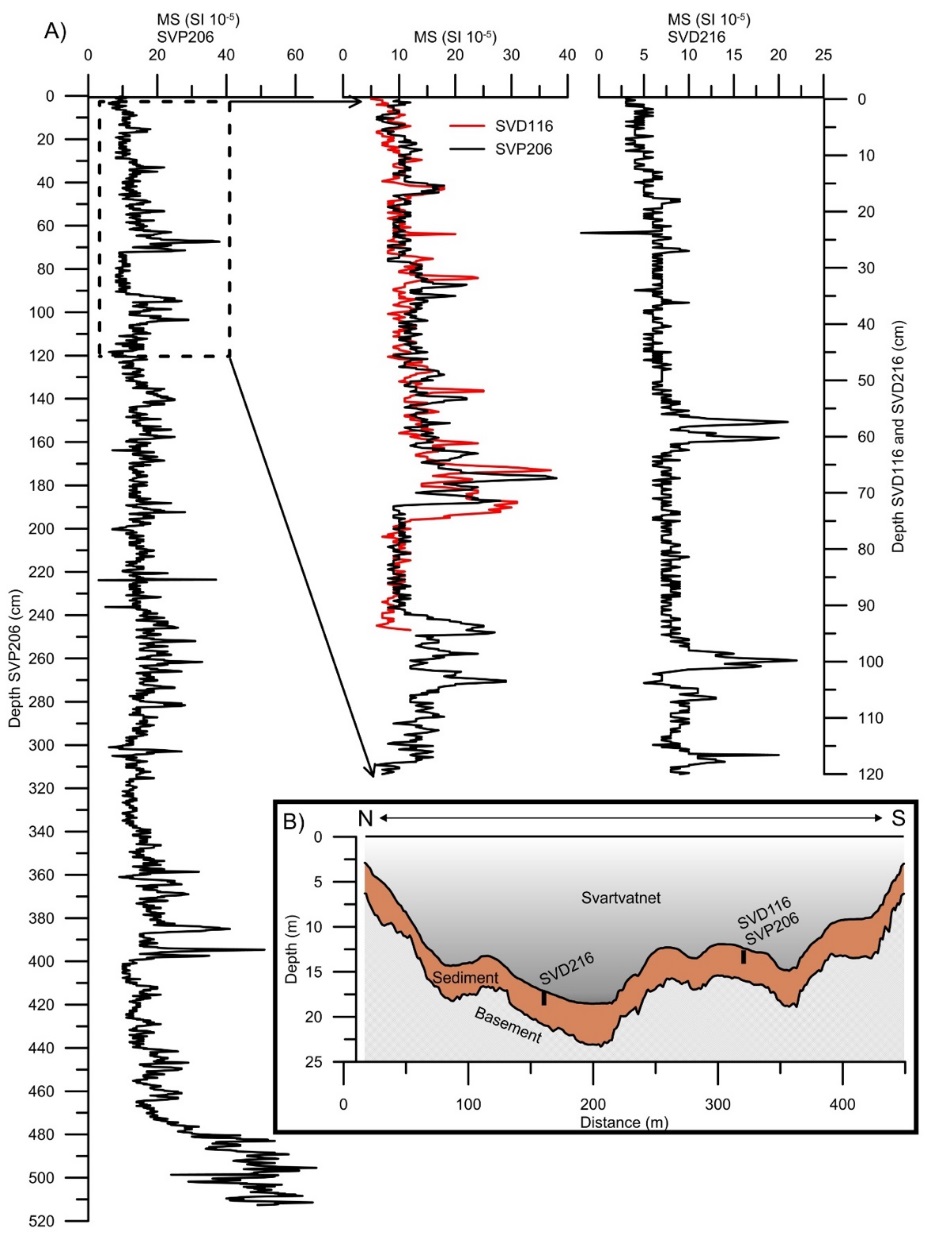


Fig. I: A) Results from the MS measurements of SVP206, SVD116 and SVD216. The results suggest that the piston core contains the topmost sediment of Svartvatnet. B) Cross-section of the north-south transect (N to S) from Fig. 2 showing the mapped draped sediment infill in Svartvatnet and the location of the cores.
